# Supplementary material for: Carbon amendment stimulates benthic nitrogen cycling during the bioremediation of particulate aquaculture waste
Source: Copernicus journal article supplement (doi:10.5194/bg-2017-293), 2017-08-14
Supplement: Supplementary file 1 [file bg-2017-293-supplement.pdf]

## 1 **Supplementary material**

2 **Table S1.** Overview of the pathways modules and reference profiles within nitrogen  
3 metabolism used to calculate the predicted relative abundance of genes within each pathway.  
4 All data was extracted from the Kyoto Encyclopaedia for Genes and Genomes (KEGG)  
5 database [www.genome.jp/kegg/](http://www.genome.jp/kegg/).

| <b>Pathway</b>                  | <b>Overview</b>               | <b>Module</b> | <b>KEGG Ortholog reference profile (KO)</b>                                                |
|---------------------------------|-------------------------------|---------------|--------------------------------------------------------------------------------------------|
| Nitrogen fixation               | Nitrogen => ammonia           | M00175        | K02588 + K02586 + K02591 - K00531                                                          |
| Nitrification                   | Ammonia => nitrite            | M00528        | K10944+K10945+K10946 K10535                                                                |
| Denitrification                 | Nitrate => nitrogen           | M00529        | (K00370+K00371+K00374+K00373, K02567+K02568) (K00368,K15864) (K04561+K02305,K15877) K00376 |
| Dissimilatory nitrate reduction | Nitrate => ammonia            | M00530        | (K00370+K00371+K00374+K00373, K02567+K02568) (K00362+K00363,K03385+K15876)                 |
| Assimilatory nitrate reduction  | Nitrate => ammonia            | M00531        | (K00367,K10534,K00372-K00360) (K00366,K17877)                                              |
| Complete nitrification          | Ammonia => nitrite => nitrate | M00804        | K10944+K10945+K10946 K10535 K00370+K00371                                                  |

6

7
